# Supplementary material for: Southwest-facing slopes control the formation of debris-covered glaciers in the Bhutan Himalaya
Source: Copernicus journal article supplement (doi:10.5194/tc-7-1303-2013), 2013-08-14
Supplement: Supplementary file 1 [file tc-7-1303-2013-supplement.pdf]

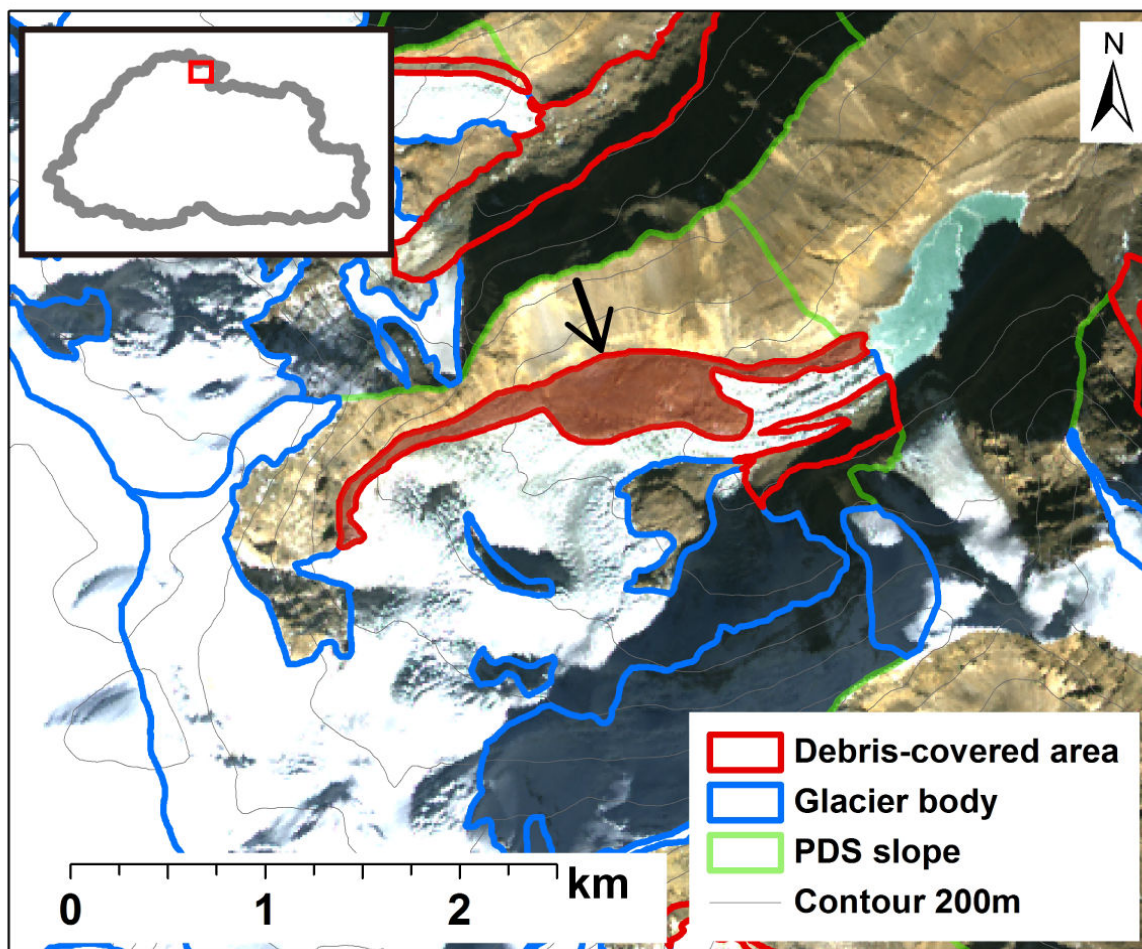

Figure S1. Example of irregularly supplied debris cover (shading), probably supplied from the neighbouring PDS-slope (allow). Inset figure shows the location.

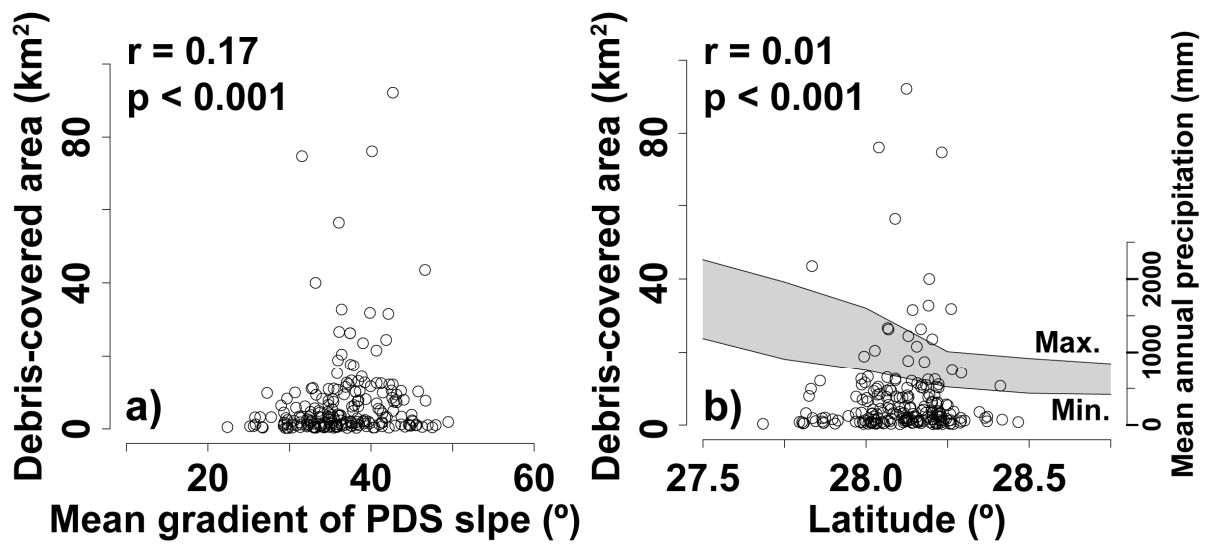

Figure S2. Relationships between a) debris-covered area and mean gradient of potential debris-supply slope, and b) debris-covered ratio and latitude in the Bhutan Himalaya. In (b), the mean annual precipitation estimated from the TRMM 3B43 product (1998–2010; 88.5°–92.5°E) is shown by grey shading.
